# Supplementary material for: The multifunctional roles of the ionic liquid [Bmim][BF4] in the creation of cadmium metal–organic frameworks
Source: Royal Society of Chemistry journal article supplement (doi:10.1039/c2ce25169h), 2012-01-01
Supplement: c2ce25169h.pdf [file c2ce25169h.pdf]

## Supplementary Materials

### The multifunctional roles of the ionic liquid [Bmim][BF<sub>4</sub>] in the creation of cadmium metal-organic frameworks

*Zai-Lai Xie, Mei-Ling Feng, Bin Tan, Xiao-Ying Huang\**

*State Key Laboratory of Structural Chemistry, Fujian Institute of Research on the Structure of Matter,  
the Chinese Academy of Sciences, Fuzhou, Fujian 350002, P.R. China*

#### Physical Measurements

All chemicals employed in this study were analytical reagents and commercially available without further purification. The purity of all samples has been confirmed by XRD patterns before physical measurements. The infrared spectra were taken on a PerKin-Elmer spectrum one FT-IR spectrometer in the 4000-400 cm<sup>-1</sup> region by using KBr pellets. Powder X-ray diffraction patterns were recorded on a Rigaku Dmax/2500 diffractometer using CuK $\alpha$  radiation or a PANalytical X'Pert PRO diffractometer using CuK $\alpha$  radiation. a Rigaku SCXmini CCD diffractometer for compound **4** with graphite-monochromated MoK $\alpha$  radiation ( $\lambda = 0.71073 \text{ \AA}$ ) at room temperature. The structures were solved by direct methods and refined by full-matrix least-squares on  $F^2$  using the SHELX97 program package. Thermogravimetric analyses (TGA) were carried out on a METTLER TGA/SDTA851e thermal analyzer on the pure polycrystalline samples from room temperature to  $\sim 500 \text{ }^\circ\text{C}$  in a ramp rate of  $10 \text{ }^\circ\text{C}/\text{min}$  in a dynamic N<sub>2</sub> atmosphere. Photoluminescence analyses were recorded on a Perkin-Elmer LS 55 luminescence spectrometer with an R928 red-sensitive photomultiplier without correction. C, H, N elemental analyses were performed on a German Elementary Vario EL III instrument.

### Experiment detail of compound 4

$\text{Cd}_3\text{F}_2(\text{C}_2\text{O}_4)(\text{ina})_2$  (**4**):  $\text{Cd}(\text{NO}_3)_2 \cdot 4\text{H}_2\text{O}$  (1.5 mmol, 0.450 g) and isonicotinate (0.5 mmol, 0.123 g) in *ca.* 1.0 g  $\text{BmimBF}_4$  were mixed in a 20 mL stainless steel reactor with a Teflon liner, the sample was heated at 160 °C for 6 days and then cooled to room temperature. Yellow lathe crystals of **4** and indefinite yellow powder was obtained by filtration. The crystalline products were selected by hand. Anal. calc. for  $\text{Cd}_3\text{F}_2\text{C}_{14}\text{H}_8\text{N}_2\text{O}_8$ : C, 23.77%; H, 1.14%; N, 3.96%. Found: C, 23.33%; H, 1.21%; N, 3.77%.

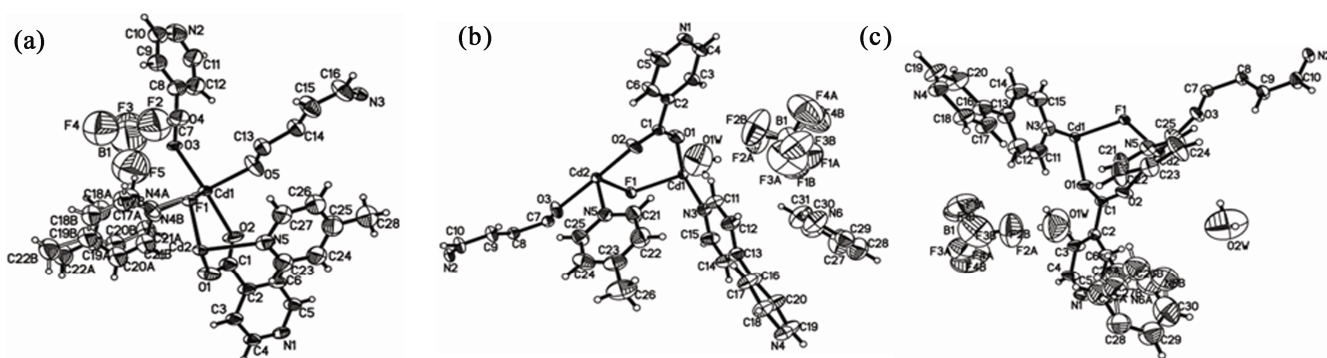

**Fig. S1** ORTEP plots showing the crystallographically asymmetric units of compounds **1** (a), **2** (b) and **3** (c); thermal ellipsoids are given at the 50% probability level.

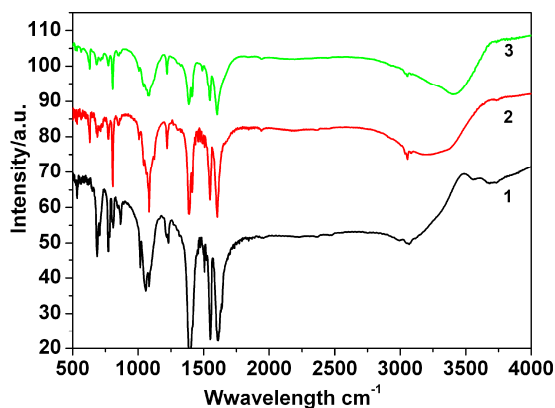

**Fig. S2** FT-IR spectra of compounds **1**, **2**, and **3**.

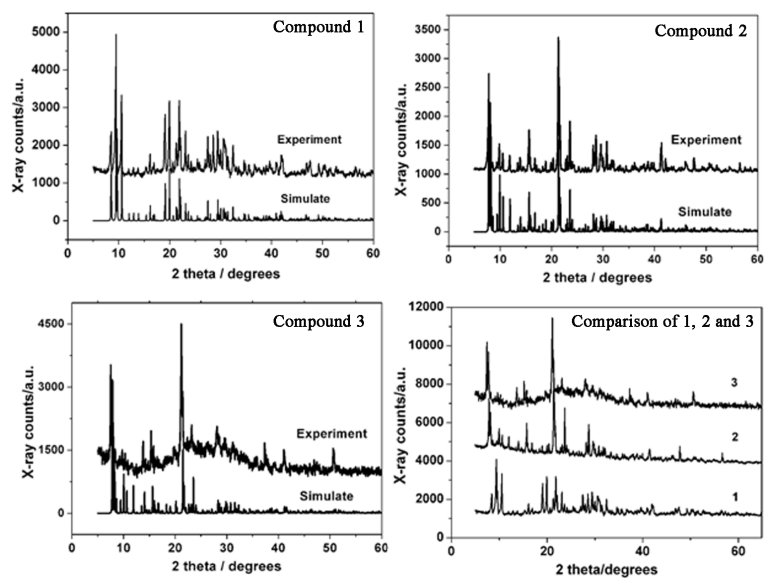

**Fig. S3** The PXRD patterns of compounds **1-3** are in good agreement with their simulated PXRD patterns calculated from the single crystal X-ray data.
